# Supplementary material for: Effect of chrysin on changes in intestinal environment and microbiome induced by fructose-feeding in rats
Source: Royal Society of Chemistry journal article supplement (doi:10.1039/c9fo01142k), 2019-01-01
Supplement: c9fo01142k1.pdf [file c9fo01142k1.pdf]

Shape 12 mm pellets

Packing 20 kg bag

### Mice and Rats

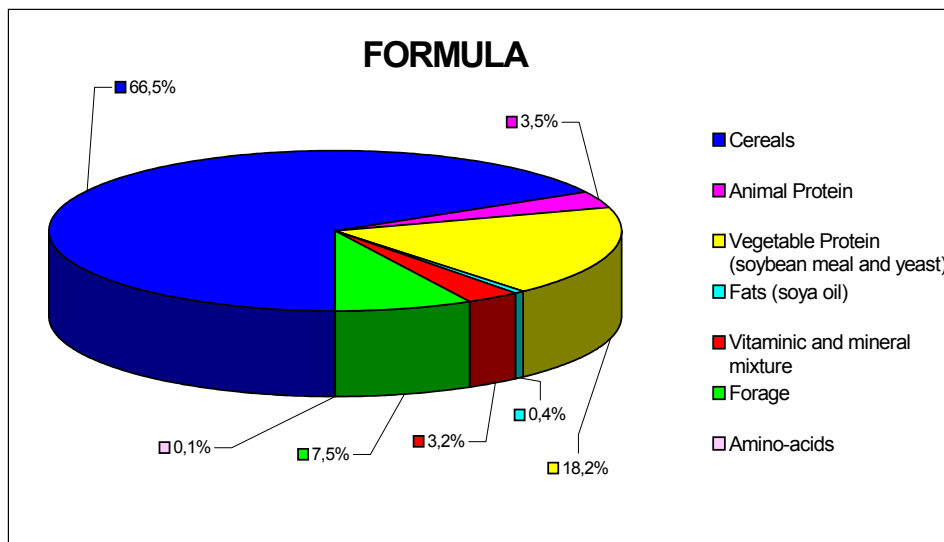

#### AMINO-ACIDS

Calculated/kg

|            |          |
|------------|----------|
| Arginine   | 10937 mg |
| Cystine    | 3862 mg  |
| Lysine     | 9721 mg  |
| Methionine | 4454 mg  |
| Tryptophan | 2826 mg  |
| Glycine    | 8746 mg  |

#### FATTY ACIDS

Calculated/kg

|                       |          |
|-----------------------|----------|
| Palmitic Acid 16:0    | 4387 mg  |
| Palmitoleic Acid 16:1 | 202 mg   |
| Stearic Acid 18:0     | 675 mg   |
| Oleic Acid 18:1       | 5046 mg  |
| Linoleic Acid 18:2    | 12335 mg |
| Linolenic Acid 18:3   | 1169 mg  |

#### CONTENTS OF VITAMINS AND MINERALS

| Vitamin calculated/kg                   |      | Nat. Value | Added | TOTAL |
|-----------------------------------------|------|------------|-------|-------|
| Vitamin A                               | U.I. | 0,00       | 14400 | 14400 |
| Vitamin D3                              | U.I. | 0,00       | 1260  | 1260  |
| Vitamin B1                              | mg   | 3,7        | 13,5  | 17,2  |
| Vitamin B2                              | mg   | 8,4        | 6,8   | 15,2  |
| Vitamin B6                              | mg   | 4,8        | 6,0   | 10,7  |
| Vitamin B12                             | mg   | -          | 0,027 | 0,027 |
| Vitamin E (α-tocopherol)                | mg   | 14,8       | 49,5  | 64,3  |
| Vitamin K3 (menadione sodium bisulfite) | mg   | 0,4        | 2,8   | 3,2   |
| Niacin                                  | mg   | 40,8       | 55,0  | 95,8  |
| Folic acid                              | mg   | 0,4        | 1,9   | 2,3   |
| d-Pantothenic Acid                      | mg   | 10,4       | 14,4  | 24,8  |
| Biotin                                  | mg   | 0,12       | 0,28  | 0,40  |
| Choline                                 | mg   | 1251       | 1005  | 2256  |

### ANALYSIS

|         | Calculated | Min    | Max    | Declared |
|---------|------------|--------|--------|----------|
| Water   | 11,09%     | 8,40%  | 13,20% | 12,00%   |
| Protein | 19,42%     | 16,65% | 24,05% | 18,50%   |
| Fat     | 2,58%      | 2,00%  | 6,00%  | 3,00%    |
| Fiber   | 5,54%      | 3,30%  | 6,90%  | 6,00%    |
| Ash     | 6,76%      | 4,90%  | 7,70%  | 7,00%    |
| NFE     | 54,61%     | -      | -      | 53,50%   |

#### Minerals calculated/kg

|                                             |    | Nat. Value | Added | TOTAL |
|---------------------------------------------|----|------------|-------|-------|
| Phosphorus                                  | mg | 5158       | 2431  | 7589  |
| Calcium                                     | mg | 6012       | 3151  | 9163  |
| Sodium                                      | mg | 1671       | 1947  | 3618  |
| Potassium                                   | mg | 8335       | -     | 8335  |
| Magnesium                                   | mg | 1980       | 0     | 1980  |
| Chlorine                                    | mg | 1381       | 3003  | 4383  |
| Manganese (sulf. mang. monohydrate)         | mg | 32         | 54    | 86    |
| Iron (iron sulfate heptahydrate)            | mg | 300        | 180   | 480   |
| Copper (copper sulfate pentahydrate)        | mg | 14,0       | 11,7  | 25,7  |
| Zinc (zinc sulfate monohydrate)             | mg | 35,5       | 67,5  | 103,0 |
| Cobalt (cobalt carbonate basic monohydrate) | mg | 0,22       | 0,63  | 0,85  |
| Iodine (calcium iodate anhydrous)           | mg | 0,08       | 0,9   | 1,0   |

METABOLIZABLE ENERGY [kCal/kg] 2668

RAW ENERGY [kCal/kg] 3952
